1 **Effects of high intensity interval exercise on cerebrovascular function: A systematic review**

2

3 Alicen A Whitaker<sup>1¶</sup>, Mohammed Alwatban<sup>1&</sup>, Andrea Freemyer<sup>1&</sup>, Jaime Perales-Puchalt<sup>2,3&</sup> and Sandra  
4 A Billinger<sup>1,3,4,¶\*</sup>

5

6 <sup>1</sup> Department of Physical Therapy and Rehabilitation Science, University of Kansas Medical Center,  
7 Kansas City, KS, United States

8 <sup>2</sup> University of Kansas Alzheimer's Disease Center, Fairway, KS, United States

9 <sup>3</sup> Department of Neurology, University of Kansas Medical Center, Kansas City, KS, United States

10 <sup>4</sup> Department of Physical Medicine and Rehabilitation, University of Kansas Medical Center, Kansas City,  
11 KS, United States

12

13 **\*Corresponding Author:**

14 Sandra A. Billinger

15 Email: sbillinger@kumc.edu

16

17 <sup>¶</sup>These authors contributed equally to this work.

18 <sup>&</sup>These authors also contributed equally to this work.

19

20 **Short title: High intensity interval exercise and cerebrovascular function**

## 21 **Abstract**

22 High intensity interval exercise (HIIE) improves aerobic fitness with decreased exercise time compared to  
23 moderate continuous exercise. A gap in knowledge exists regarding the effects of HIIE on  
24 cerebrovascular function such as cerebral blood velocity and autoregulation. The objective of this  
25 systematic review was to ascertain the effect of HIIE on cerebrovascular function in healthy individuals.  
26 We searched PubMed and the Cumulative Index to Nursing and Allied Health Literature databases with  
27 apriori key words. We followed the Preferred Reporting Items for Systematic Reviews. Twenty articles  
28 were screened and thirteen articles were excluded due to not meeting the apriori inclusion criteria. Seven  
29 articles were reviewed via the modified Sackett's quality evaluation. Outcomes included middle cerebral  
30 artery blood velocity (MCAv) (n=4), dynamic cerebral autoregulation (dCA) (n=2), cerebral de/oxygenated  
31 hemoglobin (n=2), cerebrovascular reactivity to carbon dioxide (CO<sub>2</sub>) (n=2) and cerebrovascular  
32 conductance/resistance index (n=1). Quality review was moderate with 3/7 to 5/7 quality criteria met. HIIE  
33 acutely lowered exercise MCAv compared to moderate intensity. HIIE decreased dCA phase following  
34 acute and chronic exercise compared to rest. HIIE acutely increased de/oxygenated hemoglobin  
35 compared to rest. HIIE acutely decreased cerebrovascular reactivity to higher CO<sub>2</sub> compared to rest and  
36 moderate intensity. The acute and chronic effects of HIIE on cerebrovascular function vary depending on  
37 the outcomes measured. Therefore, future research is needed to confirm the effects of HIIE on  
38 cerebrovascular function in healthy individuals and better understand the effects in individuals with  
39 chronic conditions. In order to conduct rigorous systematic reviews in the future, we recommend  
40 assessing MCAv, dCA and CO<sub>2</sub> reactivity during and post HIIE.

## 41 Introduction

42 High intensity interval exercise (HIIE) has emerged at the forefront of exercise regimens due to the  
43 shorter activity time needed to benefit[1-3]. HIIE confers similar or significant increased aerobic fitness  
44 compared to conventional moderate intensity continuous exercise[1, 4-7]. While aerobic fitness is a  
45 measure of increased cardiovascular health, the entire vascular system (including the cerebral vascular  
46 system) may be improved following increased aerobic fitness[8]. A review and meta-analysis of HIIE in  
47 healthy adults has shown significant increases in aerobic fitness [1, 5, 6, 9]. However, the effects of HIIE  
48 on cerebrovascular function have not been systematically reviewed.

49  
50 Cerebrovascular function is the ability of the cerebral blood vessels to deliver oxygen and nutrients for  
51 neuronal metabolism and maintain cerebral blood flow through dynamic autoregulation (dCA). dCA is the  
52 ability of the brain to sustain a constant cerebral blood flow despite large fluctuations in peripheral blood  
53 pressure[10] [11]. During resting conditions cerebral blood flow responds to arterial blood pressure  
54 fluctuations, neuronal metabolism, cortical activation, arterial blood gases and cardiac output [12].  
55 Cerebral blood flow can be measured at rest using magnetic resonance imaging or transcranial Doppler  
56 ultrasound (TCD). Middle cerebral artery blood velocity (MCAv) measured by TCD is the only technique to  
57 measure cerebral blood flow during exercise, with high temporal resolution [13]. MCAv is linearly related  
58 to cerebral blood flow with the caveat that the MCA diameter remains unchanged[14].

59  
60 A normal cerebrovascular response to submaximal moderate continuous exercise results in increased  
61 MCAv [15-17], increased cerebral oxygenation [18, 19] and sustained dCA[20, 21]. MCAv has been  
62 shown to concomitantly increase as exercise intensity increases, up to moderate intensity [12, 15, 22-25].  
63 MCAv is affected differently during high intensity exercise. During continuous high intensity exercise and  
64 hyperventilation, MCAv is decreased due to a reduction in arterial carbon dioxide (CO<sub>2</sub>)[26, 27] causing  
65 downstream arteriole constriction[12, 28]. Cerebrovascular reactivity is the ability of the small vessels in  
66 the brain to vasodilate and vasoconstrict in response to fluctuating CO<sub>2</sub> levels [29, 30]. The  
67 cerebrovascular response to HIIE may differ from continuous high intensity exercise due to the repetitive

68 short interval bouts that rapidly increase blood pressure which may cause cerebrovascular hyper-  
69 perfusion [31, 32]. If neuroprotective mechanisms of the brain such as dCA do not respond quickly to the  
70 repetitive and rapid increases in blood pressure, HIIE could elevate the risk for leakage within the blood  
71 brain barrier[31, 33].

72  
73 Previous scientific statements and narrative reviews have recounted the molecular, hemodynamic and  
74 structural processes (i.e. CO<sub>2</sub>, nitric oxide, systemic blood pressure, vessel compliance, glial cell integrity)  
75 associated with the cerebrovascular response that may occur during HIIE [33, 34]. However, these  
76 detailed narrative reviews[35, 36] did not report the statistical findings of previous studies showing  
77 cerebrovascular function during HIIE. To our knowledge, our current systematic review is the first to  
78 systematically search and report the results of the dynamic cerebrovascular response during HIIE.  
79 Reporting the cerebrovascular response during HIIE is important because it provides objective results to  
80 support the previously described narrative statements on hemodynamic processes during HIIE [35, 36].  
81 The purpose of this systematic review was to address the gap in knowledge and report the various study  
82 results of HIIE on cerebrovascular function compared to moderate continuous exercise or rest conditions.  
83 We systematically examined the results of HIIE studies in healthy individuals based on the  
84 operationalization of cerebrovascular outcomes.

85

## 86 **Methods**

87 This review follows the guidelines for Preferred Reporting Items for Systematic Reviews [37]. Literature  
88 searches and reviews were performed using PubMed and the Cumulative Index to Nursing and Allied  
89 Health Literature (CINAHL) databases. The University of Kansas Medical Center Online Library system  
90 was used to access these databases in February, March, and June 2020. In this systematic review, we  
91 included peer-reviewed manuscripts written in English from January 2010 to June 2020.

92

93 Key words used to search the databases included “high intensity interval training”, “HIIT”, “high intensity  
94 interval exercise” “HIIE” AND “cerebral blood flow”, “cerebral blood velocity”, “dynamic autoregulation”.

95 We believe these key words primarily reflect the high intensity interval intervention and cerebrovascular  
96 function outcome measures. The main outcomes of this systematic review were MCAv and dCA.  
97 However, additional cerebrovascular measures were also included such as oxygenated hemoglobin,  
98 cerebrovascular reactivity, cerebrovascular conductance index and cerebrovascular resistance index.  
99 Cerebrovascular conductance index is a measure of the conductance of peripheral blood pressure to  
100 cerebral blood velocity and is calculated as MCAv/mean arterial pressure (MAP). Cerebrovascular  
101 resistance index (MAP/MCAv) measures the resistance of cerebral perfusion pressure to cerebral blood  
102 velocity.

103  
104 The identified abstracts from PubMed and CINAHL were screened using the following inclusion criteria: 1)  
105 experimental or quasi-experimental, 2) aerobic exercise identified as the primary means of performing  
106 HIIE, 3) cerebrovascular measures were primary or secondary outcomes and 4) human subjects across  
107 the lifespan with no current disease. After the removal of duplicates, two researchers screened  
108 titles/abstracts for inclusion criteria (A.W. and M.A.). The full texts were examined, and data extracted  
109 (A.W. and M.A.). If the authors were unable to come to an agreement, a third author moderated  
110 incongruity (A.F.).

111  
112 A quality review was performed for each article using the modified version of Sackett's 1981 criteria[38].  
113 We critically analyzed each article's study design, population, HIIE protocols, cerebrovascular outcomes  
114 and results. If an article did not report enough information to determine sufficient quality criteria a "No"  
115 rating was given. Articles were rated based on the level of evidence including level I for large randomized  
116 control trials, level II for small randomized trial, level III for nonrandomized design, Level IV for case series  
117 and Level V for case reports [39].

118

## 119 **Results**

120 The search methods resulted in 67 articles. After removal of duplicates, 15[40-53] articles were identified  
121 in PubMed and 5[54-58] new articles in CINAHL. During the initial screening of titles/abstracts, 11 articles

122 were excluded due to HIIE not being the primary experimental protocol performed (n=6), studies not  
 123 measuring cerebral arteries (n=4) and an animal study (n=1). Studies that combined other interventions  
 124 with HIIE were excluded due to the confounding variables that could affect cerebrovascular outcomes.  
 125 After the full text assessment, two articles were excluded due to not meeting experimental or quasi  
 126 experimental criteria (n=2). See Fig 1 for flow diagram of article selection. [Insert Figure 1]

127

128 **Fig 1. Flow Diagram of Article Selection.**

129

130 We included seven articles describing cerebrovascular outcomes following HIIE within this review[41, 44,  
 131 47, 52, 56, 57, 59]. The full texts are described in Table 1. Of the articles reviewed six were small,  
 132 randomized trials and one nonrandomized cross-over trial. All the studies involved healthy individuals  
 133 although some only included men (n=1), women (n=1), or children (n= 1). Prior activity levels of  
 134 participants ranged from inactive, recreationally active and endurance trained.

135

136 **Table 1. Summary of reviewed articles.**

| Study                          | Design                            | Level of Evidence | Subjects       | Intervention                                                                                                                                                                                                                                                                                                       | Outcome measures                                                                                                                      | Results                                                                                                                                                                                                                                                                                                                                                                                                                  |
|--------------------------------|-----------------------------------|-------------------|----------------|--------------------------------------------------------------------------------------------------------------------------------------------------------------------------------------------------------------------------------------------------------------------------------------------------------------------|---------------------------------------------------------------------------------------------------------------------------------------|--------------------------------------------------------------------------------------------------------------------------------------------------------------------------------------------------------------------------------------------------------------------------------------------------------------------------------------------------------------------------------------------------------------------------|
| <b>Burma et al, March 2020</b> | Small Randomized Cross-Over Trial | II                | 9 Young Adults | 3 cycling conditions:<br>- High intensity interval training (HIIT, 1-min interval at 85-90% predicted heart rate reserve with 1-min active recovery 15% power output for 10 intervals)<br>- Moderate intensity continuous exercise (MICT, 50-60% predicted heart rate reserve for 45 min)<br>- No-exercise control | Average Exercise MCAv<br><br>dCA via Transfer Function<br><br>Analysis during forced MAP oscillations (repeated squat-stand maneuver) | Significant increase in exercise MCAv during MICT compared to HIIT (p<0.05) and baseline (p<0.05).<br><br>No change in exercise MCAv during HIIT compared to baseline (p>0.05).<br><br>Significantly higher systolic gain/phase compared to diastolic/mean gain/phase at 0.05 and 0.10 Hz during control (p<0.05).<br><br>Decreased systolic phase in 0.05 Hz immediately following HIIT (p>0.102) and MICT until hour 4 |

|                               |                                                                   |    |                    |                                                                                                                                                                                                                                                                     |                                                                                                                                                              |                                                                                                                                                                                                                                                                                                                                                                                               |
|-------------------------------|-------------------------------------------------------------------|----|--------------------|---------------------------------------------------------------------------------------------------------------------------------------------------------------------------------------------------------------------------------------------------------------------|--------------------------------------------------------------------------------------------------------------------------------------------------------------|-----------------------------------------------------------------------------------------------------------------------------------------------------------------------------------------------------------------------------------------------------------------------------------------------------------------------------------------------------------------------------------------------|
|                               |                                                                   |    |                    |                                                                                                                                                                                                                                                                     |                                                                                                                                                              | (p>0.079).<br><br>Decreased systolic phase in 0.10 Hz immediately following HIIT until hour 2 (p>.11) and immediately following MICT until hour 4 (p>0.079).<br><br>No change in gain or coherence in 0.05 Hz or 0.10 Hz during HIIT or MICT.                                                                                                                                                 |
| <b>Burma et al, June 2020</b> | Secondary Analysis of the above Small Randomized Cross-Over Trial | II | Same as above      | Same as above                                                                                                                                                                                                                                                       | Cerebrovascular reactivity to hypercapnia<br><br>Cerebrovascular reactivity to hypocapnia                                                                    | Significantly decreased absolute and relative MCA reactivity to hypercapnia immediately following HIIT up to hour 2 (p<0.018) compared to MICT and control (p<0.022).<br><br>Significantly decreased relative MCA reactivity to hypercapnia immediately following MICT up to hour 1 (p<0.024).<br><br>No significant differences in MCA reactivity to hypocapnia between conditions (p>0.31). |
| <b>Coetsee et al, 2017</b>    | Small Randomized Controlled Trial                                 | II | 67 Inactive Adults | 16-week intervention Treadmill 30 min, 3x/week<br>4 groups:<br>- High intensity Interval training (HIIT, 4 min interval at 90-95% HRmax with 3 min active recovery 70% HRmax)<br>- Moderate continuous training (MCT, 70-75% HRmax)<br>- No-exercise control (CON). | Cerebrovascular measures taken during cortical activation (Stroop test):<br>- Oxygenated Hemoglobin<br>- Deoxygenated Hemoglobin<br>- Total Hemoglobin Index | No significant differences in oxygenated (effect size=.45, p=.3), deoxygenated (effect size=0.67, p=.14), or total hemoglobin (effect size<.6, p>.18) after HIIT.<br><br>Significant decrease in deoxygenated hemoglobin (effect size=1.14, p=.01) and total hemoglobin index (effect size=1.49, p<.01) after MCT.<br><br>Significant increase in oxygenated hemoglobin                       |

|                            |                                   |    |                                   |                                                                                                                                                                                                                                                                                                                                              |                                                                                                                                                   |                                                                                                                                                                                                                                                                                                                                                                              |
|----------------------------|-----------------------------------|----|-----------------------------------|----------------------------------------------------------------------------------------------------------------------------------------------------------------------------------------------------------------------------------------------------------------------------------------------------------------------------------------------|---------------------------------------------------------------------------------------------------------------------------------------------------|------------------------------------------------------------------------------------------------------------------------------------------------------------------------------------------------------------------------------------------------------------------------------------------------------------------------------------------------------------------------------|
|                            |                                   |    |                                   |                                                                                                                                                                                                                                                                                                                                              |                                                                                                                                                   | in CON (effect size=.76, p=.03).                                                                                                                                                                                                                                                                                                                                             |
| <b>Drapeau et al, 2019</b> | Small Randomized Clinical Trial   | II | 17 Endurance Trained Males        | 6-week intervention. Cycled until exhaustion, 3x/week<br>2 groups:<br>- HIIT <sub>85</sub> (1-7 min interval at 85% of maximal aerobic power, with active recovery of 50% of maximal aerobic power)<br>- HIIT <sub>115</sub> (30sec – 1min interval at 115% of maximal aerobic power, with active recovery of 50% of maximal aerobic power). | Resting MCAv<br>Resting CVCi<br>Resting CVRi<br>dCA via Transfer Function Analysis during forced MAP oscillations (repeated squat-stand maneuver) | Significant decrease in phase at 0.10 Hz in HIIT <sub>85</sub> and HIIT <sub>115</sub> (p = .048) with no differences between intensity groups.<br><br>No significant difference in power spectral density (p > .39), gain (p > .05), or coherence (p>.05) between time or intensity.<br><br>No significant differences in MCAv (p = .4), CVCi (p = .87), or CVRi (p = .87). |
| <b>Northey et al, 2019</b> | Small Randomized Controlled Trial | II | 17 Female Breast Cancer Survivors | 12-week intervention Cycled 20-30 min 3x/week<br>3 groups:<br>- High intensity interval training (HIIT, 30 sec intervals at ~90% maximal heart rate or ~105% peak power with 2 min active recovery)<br>- Moderate intensity continuous exercise (MOD, 55-65% peak power)<br>- No-exercise control (CON)                                      | Resting MCAv,<br>Cerebrovascular Reactivity to CO <sub>2</sub>                                                                                    | No significant differences in resting MCAv (p=.24) or cerebrovascular reactivity (p=.54) after HIIT compared to MOD.<br><br>No significant differences in resting MCAv (p=.86) or cerebrovascular reactivity (p=.72) after HIIT compared to CON.                                                                                                                             |
| <b>Tallon et al, 2019</b>  | Small Randomized Cross-over Trial | II | 8 Prepubertal Children            | 2 Cycling conditions:<br>- High intensity interval exercise (HIIE, 1 min interval at 90%max watt with 1 min                                                                                                                                                                                                                                  | Exercise MCAv during each interval<br>Immediate post-exercise MCAv<br>30-minutes post-                                                            | Significant decrease in exercise MCAv during the 6 <sup>th</sup> interval of HIIE compared to baseline (10.7%, p=.004).<br><br>Significant decrease in exercise MCAv during                                                                                                                                                                                                  |



|                           |                                |     |                                 |                                                                                                                                                                                                                                                                |                                                                   |                                                                                                                                                                                                                                                                                                                                                                                                                                      |
|---------------------------|--------------------------------|-----|---------------------------------|----------------------------------------------------------------------------------------------------------------------------------------------------------------------------------------------------------------------------------------------------------------|-------------------------------------------------------------------|--------------------------------------------------------------------------------------------------------------------------------------------------------------------------------------------------------------------------------------------------------------------------------------------------------------------------------------------------------------------------------------------------------------------------------------|
|                           |                                |     |                                 | active recovery at 20%max watt for 6 intervals)<br>- Moderate-intensity steady-state exercise (MISS, 15 min at 44%max watt)                                                                                                                                    | exercise MCAv                                                     | the 3 <sup>rd</sup> and 4 <sup>th</sup> intervals of HIIE compared to MISS (p=.001). Significant decrease in MCAv immediately post-exercise following HIIE and MISS (p<.001).<br><br>No significant difference in MCAv at 30-minutes post-exercise following HIIE and MISS compared to baseline (p>.05).<br><br>Significant increase in exercise MCAv during the 2 <sup>nd</sup> minute of MISS compared to baseline (5.8%, p=.004). |
| <b>Monroe et al, 2015</b> | Nonrandomized Cross-Over Trial | III | 15 Recreationally Active Adults | 2 cycling conditions:<br>- Sprint Interval Cycling (SIC, 30 second all-out sprint interval with 4 min active recovery for 4 intervals)<br>- Constant Resistance Cycling (CRC, 18 min at 70rpm with resistance set by matching total work performed during SIC) | Oxygenated Hemoglobin (HbO2)<br><br>Deoxygenated Hemoglobin (HHb) | Significant increase in average HbO2(effect size=.536, p=.001), minimum HbO2 during recovery (effect size=.392, p<.001) and maximum HbO2 during recovery (effect size=.588, p=.001) in SIC compared to CRC.<br><br>Significant increase in average HHb during SIC compared to CRC (effect size=.386, p=.003).                                                                                                                        |

137 MCAv = middle cerebral artery blood velocity, dCA = dynamic cerebral autoregulation, min = minute,

138 HRmax = maximum heart rate, CVCi = cerebrovascular conductance index, CVRi = cerebrovascular

139 resistance index, CO<sub>2</sub> = carbon dioxide

140

## 141 High intensity interval protocols

142 Methods of prescribing HIIE varied greatly between studies. HIIE protocols included 6- to 16-week

143 exercise interventions (n = 3) or one single bout of exercise(n=4). By examining 6- to 16-weeks of HIIE,

144 the long-term or chronic effects of this intervention were studied. By examining a single bout of HIIE, the

145 immediate or acute effects of the exercise were reported. In addition to the duration variability, we found  
 146 that the mode of HIIE also differed across the included studies. One study used a treadmill as the mode  
 147 of exercise with 4-minute intervals of 90-95% maximal heart rate for 30 minutes. The remaining six  
 148 studies used cycling as the mode of exercise but differed in parameters ranging from 30 seconds to 7-  
 149 minute intervals at 85% to 115% of maximal watts or ~ 85% to 90% maximal heart rate. A constant  
 150 between all studies included an active (rather than passive) recovery interval between sprints. However,  
 151 the intensity and duration of recovery intervals differed greatly.

152

### 153 Cerebrovascular outcome measures

154 The results of this review can be operationalized based on the outcome variables measured during HIIE  
 155 such as MCAv (n=4), dCA (n=2), cerebral de/oxygenated hemoglobin (n=2), cerebrovascular reactivity to  
 156 CO<sub>2</sub> (n=2) and cerebrovascular conductance/resistance index (n=1). Table 2 describes whether HIIE  
 157 increased, decreased or had no influence on the operationalized cerebrovascular measures. A meta-  
 158 analysis was not performed due to low number of studies (≤ 2) reporting each operationalized  
 159 cerebrovascular measure.

160

161 **Table 2. Summary of the effects of HIIE on operationalized cerebrovascular measures.**

|                         | Resting MCAv | Exercise MCAv | Post-Exercise MCAv | dCA phase | dCA Gain | dCA Coherence | De/Oxygenated Hemoglobin     | Cerebrovascular Conductance Resistance Index | Cerebrovascular Reactivity to CO <sub>2</sub> |
|-------------------------|--------------|---------------|--------------------|-----------|----------|---------------|------------------------------|----------------------------------------------|-----------------------------------------------|
| Burma et al, March 2020 |              | ↓ To moderate |                    | ↓         | ⊘        | ⊘             |                              |                                              |                                               |
| Burma et al, June 2020  |              |               |                    |           |          |               |                              |                                              | ↓ To moderate and control                     |
| Coetsee et al, 2017     |              |               |                    |           |          |               | ⊘ During cortical activation |                                              |                                               |
| Drapeau et al, 2019     | ⊘            |               |                    | ↓         | ⊘        | ⊘             |                              | ⊘                                            |                                               |
| Northey                 | ⊘            |               |                    |           |          |               |                              |                                              | ⊘                                             |

et al,  
2019

Tallon et  
al, 2019

↓ To  
moderate  
and rest      ↓ To  
rest

Monroe  
et al,  
2015

↑ During  
HIIE

162 ↓ = Decreased effect, ↑ = Increased effect, ⊘ = no effect

163

## 164 **MCAv**

165 Of the studies reporting MCAv outcomes, resting MCAv (n = 2), exercise MCAv (n = 2) and MCAv  
166 immediately post exercise (n = 1) were used. No significant differences were found for resting MCAv after  
167 6- or 12-weeks of HIIE when compared to moderate continuous exercise or control[41, 44]. During HIIE,  
168 exercise MCAv was significantly decreased compared to moderate continuous exercise[56, 59].  
169 Conflicting results were found between two studies comparing exercise MCAv to rest. Burma et al.[59]  
170 reported no significant difference between average exercise MCAv and rest in adults. However, rather  
171 than reporting average exercise MCAv of the entire HIIE bout, Tallon et al.[56] reported exercise MCAv  
172 for each 1-minute sprint interval of HIIE. During the 6th sprint interval of HIIE, Tallon et al.[56] reported  
173 significantly decreased exercise MCAv compared to rest which remained immediately following  
174 exercise[56].

175

## 176 **dCA**

177 Transfer function analysis of dCA was reported in the very low and low frequency bands (n = 2). Drapeau  
178 et al.[41] conducted a 6-week intervention of HIIE and reported a significant decrease in phase compared  
179 to rest with no significant change in coherence or gain. Burma et al.[59] conducted a single bout of HIIE  
180 and reported decreased MCAv systolic phase immediately following exercise that extended up to four  
181 hours later.

182

## 183 **De/oxygenated hemoglobin**

184 Oxygenated and deoxygenated hemoglobin were reported during a single bout of HIIE (n=1) and during a  
185 16-week HIIE intervention (n=1). Monroe et al.[57] conducted a single bout of HIIE and reported an  
186 increase in oxygenated and deoxygenated hemoglobin during HIIE compared to moderate continuous  
187 exercise. Coetsee et al.[47] conducted a 16-week intervention of HIIE and reported no significant lasting  
188 changes in oxygenated or deoxygenated hemoglobin during cortical activation.

189

## 190 **Cerebrovascular reactivity**

191 Cerebrovascular reactivity to CO<sub>2</sub> were reported during a single bout of HIIE (n=1)[52] and during a 12-  
192 week HIIE intervention (n=1)[44]. After a single bout of HIIE, cerebrovascular reactivity to higher CO<sub>2</sub>, or  
193 hypercapnia, was significantly decreased by 37% and remained an hour later. The reduced  
194 cerebrovascular reactivity to hypercapnia was also significantly different than moderate intensity and  
195 control. Cerebrovascular reactivity to lower CO<sub>2</sub>, or hypocapnia, was not significantly different following a  
196 single bout of HIIE. Cerebrovascular reactivity to CO<sub>2</sub> was also not significantly different following 12  
197 weeks of HIIE[44].

198

## 199 **Cerebrovascular conductance and resistance**

200 Cerebrovascular conductance index and cerebrovascular resistance index were only reported in a single  
201 study each. A 6-week HIIE intervention reported no significant changes in cerebrovascular conductance  
202 index or cerebrovascular resistance index[41].

203

## 204 **Quality review**

205 The quality review of each study is presented in Table 3. Out of seven total quality criteria, (n=2) reported  
206 five quality criteria, (n=1) reported four quality criteria and the remaining (n=4) reported three quality  
207 criteria. Therefore, the overall quality criteria results were moderately poor. All studies accounted for  
208 subjects and monitored the HIIE protocol parameters. No studies reported avoidance of contamination or  
209 co-intervention. No studies reported blinding of the outcome assessments. Only Burma et al.[52, 59] and  
210 Monroe et al.[57] reported their reliability via coefficient of reproducibility and intraclass coefficients of

211 their measures. And only Burma et al.[52, 59] and Drapeau et al.[41] reported validity of their respective  
 212 cerebrovascular outcomes.

213

214 **Table 3. Summary of quality review.**

|                                | <b>Avoided Contamination and Co-Intervention</b> | <b>Random Assignment to Conditions</b> | <b>Blinded Assessment</b> | <b>Monitored Intervention</b> | <b>Accounted for All Subjects</b> | <b>Reported Reliability of Measures Used</b> | <b>Reported Validity of Measures Used</b> | <b>Total Number of Criteria Met</b> |
|--------------------------------|--------------------------------------------------|----------------------------------------|---------------------------|-------------------------------|-----------------------------------|----------------------------------------------|-------------------------------------------|-------------------------------------|
| <b>Burma et al, March 2020</b> | No                                               | Yes                                    | No                        | Yes                           | Yes                               | Yes                                          | Yes                                       | 5                                   |
| <b>Burma et al, June 2020</b>  | No                                               | Yes                                    | No                        | Yes                           | Yes                               | Yes                                          | Yes                                       | 5                                   |
| <b>Coetsee et al, 2017</b>     | No                                               | Yes                                    | No                        | Yes                           | Yes                               | No                                           | No                                        | 3                                   |
| <b>Drapeau et al, 2019</b>     | No                                               | Yes                                    | No                        | Yes                           | Yes                               | No                                           | Yes                                       | 4                                   |
| <b>Northey et al, 2019</b>     | No                                               | Yes                                    | No                        | Yes                           | Yes                               | No                                           | No                                        | 3                                   |
| <b>Tallon et al, 2019</b>      | No                                               | Yes                                    | No                        | Yes                           | Yes                               | No                                           | No                                        | 3                                   |
| <b>Monroe et al, 2015</b>      | No                                               | No                                     | No                        | Yes                           | Yes                               | Yes                                          | No                                        | 3                                   |

215

## 216 **Discussion**

217 This review met the objective of reporting the results of various HIIE studies and the effects on  
 218 operationalized cerebrovascular function in healthy individuals. This review is the first to report the effects  
 219 HIIE on cerebrovascular function compared to moderate continuous exercise and rest in healthy  
 220 individuals. In general, we found that the acute and chronic effects of HIIE on cerebrovascular function  
 221 vary largely depending on the methods and outcomes measured.

222

## 223 **MCAv**

224 In these studies, 6- to 12-week HIIE interventions had no effect on resting MCAv in healthy individuals.  
225 No significant change may be from too short of a HIIE intervention duration. Also a ceiling effect may be  
226 observed for young, healthy individuals and could explain no changes in resting MCAv[16]. During a  
227 single bout of HIIE, hyperventilation and downstream arteriole vasoconstriction may explain the acute  
228 decreases in exercise MCAv compared to moderate continuous exercise[12, 28, 60, 61]. Vasoconstriction  
229 may play a protective role during HIIE due to heightened peripheral blood pressure potentially causing  
230 hyper-perfusion or damage to the blood brain barrier[10, 33, 62]. During a single bout of HIIE, there is  
231 contradictory evidence comparing exercise MCAv to rest. One study reported no change in average  
232 exercise MCAv compared to resting. Another study reported decreased exercise MCAv after six sprint  
233 intervals of HIIE and remained decreased compared to rest immediately following HIIE[56]. The  
234 differences reported in exercise MCAv compared to rest could be due to age (adults versus prepubertal  
235 children) or due to the analysis of MCAv during HIIE (average over entire exercise versus separate sprint  
236 intervals). Decreases in exercise MCAv compared to rest may only occur in the late intervals of HIIE,  
237 during hyperventilation. Therefore, exercise MCAv should be reported for each interval of HIIE rather than  
238 an average of the entire exercise bout.

239

## 240 **dCA**

241 After a 6-week intervention and single bout of HIIE, dCA phase was decreased compared to rest. The  
242 chronic effects of HIIE on dCA phase may be due to elevated cardiorespiratory fitness in endurance  
243 trained individuals being associated with attenuated dCA [41, 63]. In healthy individuals, increased  
244 frequency within MCAv and MAP waveforms (that can occur with HIIE) may cause a reduction in phase  
245 due to dCA being a high-pass filter[64, 65]. Burma et al.[59] also suggests that systolic phase may reveal  
246 greater changes in dCA than both diastolic and mean phase. After a single bout of HIIE, reduction in  
247 systolic phase extended up to 4 hours and therefore the common approach of abstaining from exercise  
248 12 hours before research studies[66-68] may be too conservative[59].

249

250 Although not included in this review due to the observational study design, contradictory evidence of  
251 sustained dCA during HIIE has been reported[45]. Differences in exercise parameters between HIIE may

252 be the cause to contradictory findings due to exhaustive exercise showing decreased dCA [31, 69]. More  
253 studies are needed to confirm the acute and chronic decreases in dCA following HIIE.

254

## 255 **De/oxygenated hemoglobin**

256 After a 16-week HIIE intervention, oxygenated and deoxygenated hemoglobin during cortical activation  
257 did not change. However, the 16-week HIIE intervention decreased reaction time during cortical activation  
258 and therefore may have increased efficiency of cortical oxygen use. Also, during a single bout of HIIE  
259 oxygenated and deoxygenated hemoglobin increased compared to moderate continuous exercise. The  
260 acute and chronic effects of HIIE on oxygenated and deoxygenated hemoglobin still needs further  
261 investigation due to each only being reported in a single study.

262

## 263 **Cerebrovascular reactivity**

264 A 12-week HIIE intervention did not significantly change cerebrovascular reactivity which could be due to  
265 vascular desensitization from chronic exposure to CO<sub>2</sub> during HIIE[33, 70]. Following a single bout of  
266 HIIE, cerebrovascular reactivity to hypercapnia was decreased showing the inability of the  
267 cerebrovascular system to maximally vasodilate. The maximal capacity for vasodilation after HIIE may be  
268 reduced following HIIE due to prolonged cerebrovascular vasoconstriction that occurs with  
269 hyperventilation during HIIE[33, 52]. Cerebrovascular reactivity to hypocapnia was not changed following  
270 a single bout of HIIE due to the ability of the vessels to vasoconstrict remaining intact[52]. The reduction  
271 in cerebrovascular reactivity to higher CO<sub>2</sub> remains an hour after HIIE. Therefore, the authors conclude  
272 again that the common approach of abstaining from exercise 12 hours before research studies[67, 71, 72]  
273 may be too conservative[52].

274

## 275 **Cerebrovascular conductance and resistance**

276 Cerebrovascular conductance and resistance were not significantly changed following a 6-week HIIE  
277 intervention. While a 6-week HIIE intervention significantly improved peripheral arterial conductance and  
278 resistance[4], this change in the peripheral arteries may not be demonstrated in the cerebrovascular

279 arterial conductance or resistance[35, 41]. However, due to the cerebrovascular conductance or  
280 resistance index being reported in only a single study, no conclusive effects of HIIE can be determined.

281

## 282 **Article limitations**

283 The individual study limitations have been previously acknowledged within the published articles or have  
284 been identified by authors (AW and MA) during the quality review. Most of the studies were small,  
285 randomized trials and included mostly young individuals. The small sample size available in males (n =  
286 17), females (n = 17), or children (n = 8) limit the generalizability of results presented in this systematic  
287 review to a larger population. All studies implemented HIIE protocols that differed in time, repetitions and  
288 intensity levels, therefore making comparisons between studies difficult. These studies report potential  
289 limitations to the methods of measuring cerebrovascular function. TCD is the preeminent method of  
290 measuring MCAv during exercise but MCAv during HIIE may be underestimated[73]. However, some of  
291 the studies report the minor changes in expired CO<sub>2</sub> during HIIE were not likely to induce changes in MCA  
292 diameter[14, 56, 57]. The studies also report underestimation of cerebral oxygenation due to the two-  
293 channel near infrared spectrometer not measuring the motor, occipital, or parietal cortex [47, 57].

294

## 295 **Review limitations**

296 The authors acknowledge a risk of publication bias by only including peer-reviewed articles written in  
297 English and did not include grey literature. The cerebrovascular function measures included within this  
298 review vary greatly and have vast heterogeneity. While HIIE is not a new mode of exercise, studying  
299 cerebrovascular measures during HIIE is novel. Therefore, authors could only identify seven small studies  
300 with the oldest article dating back to 2015. The primary outcome of MCAv (n=4) and dCA (n=2) were  
301 reported in few studies with low power. Therefore, a meta-analysis could not be performed due to  
302 insufficient mathematical combination.

303

## 304 **Conclusion**



305 This review has provided preliminary information studying the effects of HIIE on cerebrovascular function.  
306 Although the amount of studies reporting cerebrovascular function during HIIE was small, we propose  
307 that a single bout of HIIE may acutely decrease MCAv, dCA and cerebrovascular reactivity to  
308 hypercapnia while increasing oxygenated hemoglobin, during or immediately following HIIE compared to  
309 moderate continuous exercise or rest conditions. No significant chronic effects were found for resting  
310 MCAv, cerebrovascular reactivity to CO<sub>2</sub>, cerebrovascular conductance or resistance index after 6- or 12-  
311 week interventions of HIIE. Further research is warranted to confirm the acute and chronic effects of HIIE  
312 on MCAv, dCA, and cerebrovascular reactivity.

313  
314 With increased interest in healthy brain aging and implementing interventions to maintain or improve brain  
315 health[74], studying the effects of HIIE interventions are critically needed[35, 36]. While this review only  
316 included healthy individuals, we provide an early reference to understanding “normal” physiological  
317 effects of HIIE on cerebrovascular function and the need to compare to clinical populations.

318  
319 Future HIIE research is needed to evaluate cerebrovascular function not only during HIIE but also  
320 immediately following exercise. More studies such as randomized controlled trials with large sample sizes  
321 are needed to conduct a meta-analysis to combine and statistically analyze the summary results of HIIE  
322 on cerebrovascular function. Additionally, more studies are needed to determine the optimal interval  
323 parameters for HIIE and cerebrovascular function for humans.

## 324 References

- 325 1. Batacan RB, Jr., Duncan MJ, Dalbo VJ, Tucker PS, Fenning AS. Effects of high-intensity interval  
326 training on cardiometabolic health: a systematic review and meta-analysis of intervention studies. *Br J*  
327 *Sports Med.* 2017;51(6):494-503. Epub 2016/11/01. doi: 10.1136/bjsports-2015-095841. PubMed PMID:  
328 27797726.
- 329 2. Costa EC, Hay JL, Kehler DS, Boreskie KF, Arora RC, Umpierre D, et al. Effects of High-Intensity  
330 Interval Training Versus Moderate-Intensity Continuous Training On Blood Pressure in Adults with Pre-  
331 to Established Hypertension: A Systematic Review and Meta-Analysis of Randomized Trials. *Sports Med.*  
332 2018;48(9):2127-42. Epub 2018/06/28. doi: 10.1007/s40279-018-0944-y. PubMed PMID: 29949110.
- 333 3. Ramos JS, Dalleck LC, Tjonna AE, Beetham KS, Coombes JS. The impact of high-intensity interval  
334 training versus moderate-intensity continuous training on vascular function: a systematic review and  
335 meta-analysis. *Sports Med.* 2015;45(5):679-92. Epub 2015/03/17. doi: 10.1007/s40279-015-0321-z.  
336 PubMed PMID: 25771785.
- 337 4. Rakobowchuk M, Tanguay S, Burgomaster KA, Howarth KR, Gibala MJ, MacDonald MJ. Sprint  
338 interval and traditional endurance training induce similar improvements in peripheral arterial stiffness  
339 and flow-mediated dilation in healthy humans. *Am J Physiol Regul Integr Comp Physiol.*  
340 2008;295(1):R236-42. Epub 2008/04/25. doi: 10.1152/ajpregu.00069.2008. PubMed PMID: 18434437;  
341 PubMed Central PMCID: PMCPMC2494806.
- 342 5. Tabata I, Nishimura K, Kouzaki M, Hirai Y, Ogita F, Miyachi M, et al. Effects of moderate-intensity  
343 endurance and high-intensity intermittent training on anaerobic capacity and VO<sub>2</sub>max. *Med Sci Sports*  
344 *Exerc.* 1996;28(10):1327-30. Epub 1996/10/01. doi: 10.1097/00005768-199610000-00018. PubMed  
345 PMID: 8897392.
- 346 6. Cunningham DA, McCrimmon D, Vlach LF. Cardiovascular response to interval and continuous  
347 training in women. *Eur J Appl Physiol Occup Physiol.* 1979;41(3):187-97. Epub 1979/07/02. doi:  
348 10.1007/bf00430011. PubMed PMID: 488084.
- 349 7. Edge J, Bishop D, Goodman C. The effects of training intensity on muscle buffer capacity in  
350 females. *Eur J Appl Physiol.* 2006;96(1):97-105. Epub 2005/11/12. doi: 10.1007/s00421-005-0068-6.  
351 PubMed PMID: 16283370.
- 352 8. Ainslie PN, Cotter JD, George KP, Lucas S, Murrell C, Shave R, et al. Elevation in cerebral blood  
353 flow velocity with aerobic fitness throughout healthy human ageing. *J Physiol.* 2008;586(16):4005-10.  
354 Epub 2008/07/19. doi: 10.1113/jphysiol.2008.158279. PubMed PMID: 18635643; PubMed Central  
355 PMCID: PMCPMC2538930.
- 356 9. Bayati M, Farzad B, Gharakhanlou R, Agha-Alinejad H. A practical model of low-volume high-  
357 intensity interval training induces performance and metabolic adaptations that resemble 'all-out' sprint  
358 interval training. *J Sports Sci Med.* 2011;10(3):571-6. Epub 2011/01/01. PubMed PMID: 24150635;  
359 PubMed Central PMCID: PMCPMC3737829.
- 360 10. Aaslid R, Lindegaard KF, Sorteberg W, Nornes H. Cerebral autoregulation dynamics in humans.  
361 *Stroke.* 1989;20(1):45-52. Epub 1989/01/01. doi: 10.1161/01.str.20.1.45. PubMed PMID: 2492126.
- 362 11. Li Z, Zhang M, Xin Q, Luo S, Zhou W, Cui R, et al. Assessment of cerebral oxygenation oscillations  
363 in subjects with hypertension. *Microvasc Res.* 2013;88:32-41. Epub 2013/04/16. doi:  
364 10.1016/j.mvr.2013.04.003. PubMed PMID: 23583904.
- 365 12. Smith KJ, Ainslie PN. Regulation of cerebral blood flow and metabolism during exercise. *Exp*  
366 *Physiol.* 2017;102(11):1356-71. Epub 2017/08/09. doi: 10.1113/EP086249. PubMed PMID: 28786150.
- 367 13. Brassard P, Ainslie PN, Secher NH. Cerebral oxygenation in health and disease. *Front Physiol.*  
368 2014;5:458. Epub 2014/12/17. doi: 10.3389/fphys.2014.00458. PubMed PMID: 25505422; PubMed  
369 Central PMCID: PMCPMC4241837.

- 370 14. Serrador JM, Picot PA, Rutt BK, Shoemaker JK, Bondar RL. MRI measures of middle cerebral  
371 artery diameter in conscious humans during simulated orthostasis. *Stroke*. 2000;31(7):1672-8. Epub  
372 2000/07/08. doi: 10.1161/01.str.31.7.1672. PubMed PMID: 10884472.
- 373 15. Witte E, Liu Y, Ward JL, Kempf KS, Whitaker A, Vidoni ED, et al. Exercise intensity and middle  
374 cerebral artery dynamics in humans. *Respir Physiol Neurobiol*. 2019;262:32-9. Epub 2019/02/03. doi:  
375 10.1016/j.resp.2019.01.013. PubMed PMID: 30710650; PubMed Central PMCID: PMC6393201.
- 376 16. Ward JL, Craig JC, Liu Y, Vidoni ED, Maletsky R, Poole DC, et al. Effect of healthy aging and sex on  
377 middle cerebral artery blood velocity dynamics during moderate-intensity exercise. *Am J Physiol Heart  
378 Circ Physiol*. 2018;315(3):H492-H501. Epub 2018/05/19. doi: 10.1152/ajpheart.00129.2018. PubMed  
379 PMID: 29775407; PubMed Central PMCID: PMC6172645.
- 380 17. Brugniaux JV, Marley CJ, Hodson DA, New KJ, Bailey DM. Acute exercise stress reveals  
381 cerebrovascular benefits associated with moderate gains in cardiorespiratory fitness. *J Cereb Blood Flow  
382 Metab*. 2014;34(12):1873-6. Epub 2014/10/02. doi: 10.1038/jcbfm.2014.142. PubMed PMID: 25269518;  
383 PubMed Central PMCID: PMC4269737.
- 384 18. Davenport MH, Hogan DB, Eskes GA, Longman RS, Poulin MJ. Cerebrovascular reserve: the link  
385 between fitness and cognitive function? *Exerc Sport Sci Rev*. 2012;40(3):153-8. Epub 2012/04/17. doi:  
386 10.1097/JES.0b013e3182553430. PubMed PMID: 22504726.
- 387 19. Fisher JP, Hartwich D, Seifert T, Olesen ND, McNulty CL, Nielsen HB, et al. Cerebral perfusion,  
388 oxygenation and metabolism during exercise in young and elderly individuals. *J Physiol*.  
389 2013;591(7):1859-70. Epub 2012/12/12. doi: 10.1113/jphysiol.2012.244905. PubMed PMID: 23230234;  
390 PubMed Central PMCID: PMC3624856.
- 391 20. Brys M, Brown CM, Marthol H, Franta R, Hilz MJ. Dynamic cerebral autoregulation remains  
392 stable during physical challenge in healthy persons. *Am J Physiol Heart Circ Physiol*. 2003;285(3):H1048-  
393 54. Epub 2003/08/14. doi: 10.1152/ajpheart.00062.2003. PubMed PMID: 12915389.
- 394 21. Ogoh S, Fadel PJ, Zhang R, Selmer C, Jans O, Secher NH, et al. Middle cerebral artery flow  
395 velocity and pulse pressure during dynamic exercise in humans. *Am J Physiol Heart Circ Physiol*.  
396 2005;288(4):H1526-31. Epub 2004/12/14. doi: 10.1152/ajpheart.00979.2004. PubMed PMID: 15591094.
- 397 22. Steventon JJ, Hansen AB, Whittaker JR, Wildfong KW, Nowak-Fluck D, Tymko MM, et al.  
398 Cerebrovascular Function in the Large Arteries Is Maintained Following Moderate Intensity Exercise.  
399 *Front Physiol*. 2018;9:1657. Epub 2018/12/07. doi: 10.3389/fphys.2018.01657. PubMed PMID:  
400 30519192; PubMed Central PMCID: PMC6258791.
- 401 23. Herholz K, Buskies W, Rist M, Pawlik G, Hollmann W, Heiss WD. Regional cerebral blood flow in  
402 man at rest and during exercise. *J Neurol*. 1987;234(1):9-13. Epub 1987/01/01. doi:  
403 10.1007/bf00314001. PubMed PMID: 3102697.
- 404 24. Jorgensen LG, Perko M, Hanel B, Schroeder TV, Secher NH. Middle cerebral artery flow velocity  
405 and blood flow during exercise and muscle ischemia in humans. *J Appl Physiol (1985)*. 1992;72(3):1123-  
406 32. Epub 1992/03/01. doi: 10.1152/jappl.1992.72.3.1123. PubMed PMID: 1568967.
- 407 25. Thomas SN, Schroeder T, Secher NH, Mitchell JH. Cerebral blood flow during submaximal and  
408 maximal dynamic exercise in humans. *J Appl Physiol (1985)*. 1989;67(2):744-8. Epub 1989/08/01. doi:  
409 10.1152/jappl.1989.67.2.744. PubMed PMID: 2507500.
- 410 26. Hellstrom G, Wahlgren NG. Physical exercise increases middle cerebral artery blood flow  
411 velocity. *Neurosurg Rev*. 1993;16(2):151-6. Epub 1993/01/01. doi: 10.1007/bf00258249. PubMed PMID:  
412 8345909.
- 413 27. Moraine JJ, Lamotte M, Berre J, Niset G, Leduc A, Naeije R. Relationship of middle cerebral  
414 artery blood flow velocity to intensity during dynamic exercise in normal subjects. *Eur J Appl Physiol  
415 Occup Physiol*. 1993;67(1):35-8. Epub 1993/01/01. doi: 10.1007/bf00377701. PubMed PMID: 8375362.

- 416 28. Ogoh S, Ainslie PN. Regulatory mechanisms of cerebral blood flow during exercise: new  
417 concepts. *Exerc Sport Sci Rev*. 2009;37(3):123-9. Epub 2009/06/25. doi:  
418 10.1097/JES.0b013e3181aa64d7. PubMed PMID: 19550203.
- 419 29. Maeda H, Matsumoto M, Handa N, Hougaku H, Ogawa S, Itoh T, et al. Reactivity of cerebral  
420 blood flow to carbon dioxide in various types of ischemic cerebrovascular disease: evaluation by the  
421 transcranial Doppler method. *Stroke*. 1993;24(5):670-5. Epub 1993/05/01. doi: 10.1161/01.str.24.5.670.  
422 PubMed PMID: 8488521.
- 423 30. Willie CK, Macleod DB, Shaw AD, Smith KJ, Tzeng YC, Eves ND, et al. Regional brain blood flow in  
424 man during acute changes in arterial blood gases. *J Physiol*. 2012;590(14):3261-75. Epub 2012/04/13.  
425 doi: 10.1113/jphysiol.2012.228551. PubMed PMID: 22495584; PubMed Central PMCID:  
426 PMCPMC3459041.
- 427 31. Bailey DM, Evans KA, McEneny J, Young IS, Hullin DA, James PE, et al. Exercise-induced  
428 oxidative-nitrosative stress is associated with impaired dynamic cerebral autoregulation and blood-brain  
429 barrier leakage. *Exp Physiol*. 2011;96(11):1196-207. Epub 2011/08/16. doi:  
430 10.1113/expphysiol.2011.060178. PubMed PMID: 21841038.
- 431 32. Phillips AA, Matin N, Jia M, Squair JW, Monga A, Zheng MMZ, et al. Transient Hypertension after  
432 Spinal Cord Injury Leads to Cerebrovascular Endothelial Dysfunction and Fibrosis. *J Neurotrauma*.  
433 2018;35(3):573-81. Epub 2017/11/17. doi: 10.1089/neu.2017.5188. PubMed PMID: 29141501; PubMed  
434 Central PMCID: PMCPMC6421994.
- 435 33. Lucas SJ, Cotter JD, Brassard P, Bailey DM. High-intensity interval exercise and cerebrovascular  
436 health: curiosity, cause, and consequence. *J Cereb Blood Flow Metab*. 2015;35(6):902-11. Epub  
437 2015/04/03. doi: 10.1038/jcbfm.2015.49. PubMed PMID: 25833341; PubMed Central PMCID:  
438 PMCPMC4640257.
- 439 34. Franklin BA, Thompson PD, Al-Zaiti SS, Albert CM, Hivert MF, Levine BD, et al. Exercise-Related  
440 Acute Cardiovascular Events and Potential Deleterious Adaptations Following Long-Term Exercise  
441 Training: Placing the Risks Into Perspective-An Update: A Scientific Statement From the American Heart  
442 Association. *Circulation*. 2020;141(13):e705-e36. Epub 2020/02/27. doi:  
443 10.1161/CIR.0000000000000749. PubMed PMID: 32100573.
- 444 35. Lucas SJE, Cotter JD, Brassard P, Bailey DM. High-intensity interval exercise and cerebrovascular  
445 health: curiosity, cause, and consequence. *J Cerebr Blood F Met*. 2015;35(6):902-11. doi:  
446 10.1038/jcbfm.2015.49. PubMed PMID: WOS:000355575600003.
- 447 36. Calverley TA, Ogoh S, Marley CJ, Steggall M, Marchi N, Brassard P, et al. HIITing the brain with  
448 exercise: mechanisms, consequences and practical recommendations. *J Physiol*. 2020;598(13):2513-30.  
449 Epub 2020/04/30. doi: 10.1113/JP275021. PubMed PMID: 32347544.
- 450 37. Moher D, Liberati A, Tetzlaff J, Altman DG, Group P. Preferred reporting items for systematic  
451 reviews and meta-analyses: the PRISMA statement. *BMJ*. 2009;339:b2535. Epub 2009/07/23. doi:  
452 10.1136/bmj.b2535. PubMed PMID: 19622551; PubMed Central PMCID: PMCPMC2714657.
- 453 38. Sackett DL. How to read clinical journals. *Can Med Assoc J*. 1982;126(12):1373. Epub  
454 1982/06/15. PubMed PMID: 20313761; PubMed Central PMCID: PMCPMC1863136.
- 455 39. Sackett DL. Rules of evidence and clinical recommendations for the management of patients.  
456 *Can J Cardiol*. 1993;9(6):487-9. Epub 1993/07/01. PubMed PMID: 8221340.
- 457 40. Dupuy O, Tremblay J. Impact of Carbohydrate Ingestion on Cognitive Flexibility and Cerebral  
458 Oxygenation during High-Intensity Intermittent Exercise: A Comparison between Maple Products and  
459 Usual Carbohydrate Solutions. *Nutrients*. 2019;11(9). Epub 2019/08/31. doi: 10.3390/nu11092019.  
460 PubMed PMID: 31466305; PubMed Central PMCID: PMCPMC6770040.
- 461 41. Drapeau A, Labrecque L, Imhoff S, Paquette M, Le Blanc O, Malenfant S, et al. Six weeks of high-  
462 intensity interval training to exhaustion attenuates dynamic cerebral autoregulation without influencing

- 463 resting cerebral blood velocity in young fit men. *Physiol Rep.* 2019;7(15):e14185. Epub 2019/08/03. doi:  
464 10.14814/phy2.14185. PubMed PMID: 31373166; PubMed Central PMCID: PMC6675921.
- 465 42. Willis SJ, Borrani F, Millet GP. Leg- vs arm-cycling repeated sprints with blood flow restriction  
466 and systemic hypoxia. *Eur J Appl Physiol.* 2019;119(8):1819-28. Epub 2019/06/13. doi: 10.1007/s00421-  
467 019-04171-0. PubMed PMID: 31187281.
- 468 43. Klein T, Bailey TG, Abeln V, Schneider S, Askew CD. Cerebral Blood Flow during Interval and  
469 Continuous Exercise in Young and Old Men. *Med Sci Sports Exerc.* 2019;51(7):1523-31. Epub  
470 2019/02/16. doi: 10.1249/MSS.0000000000001924. PubMed PMID: 30768552.
- 471 44. Northey JM, Pumpa KL, Quinlan C, Ikin A, Toohey K, Smee DJ, et al. Cognition in breast cancer  
472 survivors: A pilot study of interval and continuous exercise. *J Sci Med Sport.* 2019;22(5):580-5. Epub  
473 2018/12/18. doi: 10.1016/j.jsams.2018.11.026. PubMed PMID: 30554923.
- 474 45. Tsukamoto H, Hashimoto T, Olesen ND, Petersen LG, Sorensen H, Nielsen HB, et al. Dynamic  
475 Cerebral Autoregulation Is Maintained during High-Intensity Interval Exercise. *Med Sci Sports Exerc.*  
476 2019;51(2):372-8. Epub 2018/09/27. doi: 10.1249/MSS.0000000000001792. PubMed PMID: 30252775.
- 477 46. Hanssen H, Minghetti A, Magon S, Rossmessl A, Rasenack M, Papadopoulou A, et al. Effects of  
478 different endurance exercise modalities on migraine days and cerebrovascular health in episodic  
479 migraineurs: A randomized controlled trial. *Scand J Med Sci Sports.* 2018;28(3):1103-12. Epub  
480 2017/11/22. doi: 10.1111/sms.13023. PubMed PMID: 29161767.
- 481 47. Coetsee C, Terblanche E. Cerebral oxygenation during cortical activation: the differential  
482 influence of three exercise training modalities. A randomized controlled trial. *Eur J Appl Physiol.*  
483 2017;117(8):1617-27. Epub 2017/06/02. doi: 10.1007/s00421-017-3651-8. PubMed PMID: 28567669.
- 484 48. Kirkham AA, Shave RE, Bland KA, Bovard JM, Eves ND, Gelmon KA, et al. Protective effects of  
485 acute exercise prior to doxorubicin on cardiac function of breast cancer patients: A proof-of-concept  
486 RCT. *Int J Cardiol.* 2017;245:263-70. Epub 2017/07/25. doi: 10.1016/j.ijcard.2017.07.037. PubMed PMID:  
487 28735755.
- 488 49. Gjellesvik TI, Becker F, Tjonna AE, Indredavik B, Nilsen H, Brurok B, et al. Effects of High-Intensity  
489 Interval Training after Stroke (The HIIT-Stroke study) - A Multicenter Randomized Controlled Trial. *Arch*  
490 *Phys Med Rehabil.* 2020. Epub 2020/03/08. doi: 10.1016/j.apmr.2020.02.006. PubMed PMID: 32145280.
- 491 50. Scott JM, Tucker WJ, Martin D, Crowell JB, Goetchius E, Ozgur O, et al. Association of Exercise  
492 and Swimming Goggles With Modulation of Cerebro-ocular Hemodynamics and Pressures in a Model of  
493 Spaceflight-Associated Neuro-ocular Syndrome. *JAMA Ophthalmol.* 2019;137(6):652-9. Epub  
494 2019/04/19. doi: 10.1001/jamaophthalmol.2019.0459. PubMed PMID: 30998818; PubMed Central  
495 PMCID: PMC6567831.
- 496 51. Saoi M, Percival M, Nemr C, Li A, Gibala M, Britz-McKibbin P. Characterization of the Human  
497 Skeletal Muscle Metabolome for Elucidating the Mechanisms of Bicarbonate Ingestion on Strenuous  
498 Interval Exercise. *Anal Chem.* 2019;91(7):4709-18. Epub 2019/03/06. doi:  
499 10.1021/acs.analchem.9b00149. PubMed PMID: 30835436.
- 500 52. Burma JS, Macaulay A, Copeland P, Khatra O, Bouliane KJ, Smirl JD. Comparison of  
501 cerebrovascular reactivity recovery following high-intensity interval training and moderate-intensity  
502 continuous training. *Physiol Rep.* 2020;8(11):e14467. Epub 2020/06/09. doi: 10.14814/phy2.14467.  
503 PubMed PMID: 32506845; PubMed Central PMCID: PMC67276190.
- 504 53. Labrecque L, Drapeau A, Rahimaly K, Imhoff S, Billaut F, Brassard P. Comparable blood velocity  
505 changes in middle and posterior cerebral arteries during and following acute high-intensity exercise in  
506 young fit women. *Physiol Rep.* 2020;8(9):e14430. Epub 2020/04/29. doi: 10.14814/phy2.14430. PubMed  
507 PMID: 32342622; PubMed Central PMCID: PMC67186567.
- 508 54. Peyravi A, Yazdanpanahi N, Nayeri H, Hosseini SA. The effect of endurance training with crocin  
509 consumption on the levels of MFN2 and DRP1 gene expression and glucose and insulin indices in the

- 510 muscle tissue of diabetic rats. *J Food Biochem.* 2020;44(2):e13125. Epub 2019/12/19. doi:  
511 10.1111/jfbc.13125. PubMed PMID: 31849103.
- 512 55. Komiyama T, Tanoue Y, Sudo M, Costello JT, Uehara Y, Higaki Y, et al. Cognitive Impairment  
513 during High-Intensity Exercise: Influence of Cerebral Blood Flow. *Med Sci Sports Exerc.* 2020;52(3):561-8.  
514 Epub 2019/10/15. doi: 10.1249/MSS.0000000000002183. PubMed PMID: 31609297.
- 515 56. Tallon CM, Simair RG, Koziol AV, Ainslie PN, McManus AM. Intracranial Vascular Responses to  
516 High-Intensity Interval Exercise and Moderate-Intensity Steady-State Exercise in Children. *Pediatr Exerc  
517 Sci.* 2019;31(3):290-5. Epub 2019/03/06. doi: 10.1123/pes.2018-0234. PubMed PMID: 30832540.
- 518 57. Monroe DC, Gist NH, Freese EC, O'Connor PJ, McCully KK, Dishman RK. Effects of Sprint Interval  
519 Cycling on Fatigue, Energy, and Cerebral Oxygenation. *Med Sci Sports Exerc.* 2016;48(4):615-24. Epub  
520 2015/11/13. doi: 10.1249/MSS.0000000000000809. PubMed PMID: 26559448.
- 521 58. Hansen RK, Nielsen PS, Schelske MW, Secher NH, Volianitis S. CO<sub>2</sub> supplementation dissociates  
522 cerebral oxygenation and middle cerebral artery blood velocity during maximal cycling. *Scand J Med Sci  
523 Sports.* 2020;30(3):399-407. Epub 2019/10/28. doi: 10.1111/sms.13582. PubMed PMID: 31650627.
- 524 59. Burma JS, Copeland P, Macaulay A, Khatra O, Wright AD, Smirl JD. Dynamic cerebral  
525 autoregulation across the cardiac cycle during 8 hr of recovery from acute exercise. *Physiol Rep.*  
526 2020;8(5):e14367. Epub 2020/03/13. doi: 10.14814/phy2.14367. PubMed PMID: 32163235; PubMed  
527 Central PMCID: PMC7066871.
- 528 60. Gonzalez-Alonso J, Dalsgaard MK, Osada T, Volianitis S, Dawson EA, Yoshiga CC, et al. Brain and  
529 central haemodynamics and oxygenation during maximal exercise in humans. *J Physiol.* 2004;557(Pt  
530 1):331-42. Epub 2004/03/09. doi: 10.1113/jphysiol.2004.060574. PubMed PMID: 15004212; PubMed  
531 Central PMCID: PMC1665053.
- 532 61. Linkis P, Jorgensen LG, Olesen HL, Madsen PL, Lassen NA, Secher NH. Dynamic exercise  
533 enhances regional cerebral artery mean flow velocity. *J Appl Physiol (1985).* 1995;78(1):12-6. Epub  
534 1995/01/01. doi: 10.1152/jappl.1995.78.1.12. PubMed PMID: 7713801.
- 535 62. Brassard P, Kim YS, van Lieshout J, Secher NH, Rosenmeier JB. Endotoxemia reduces cerebral  
536 perfusion but enhances dynamic cerebrovascular autoregulation at reduced arterial carbon dioxide  
537 tension. *Crit Care Med.* 2012;40(6):1873-8. Epub 2012/05/23. doi: 10.1097/CCM.0b013e3182474ca7.  
538 PubMed PMID: 22610190.
- 539 63. Labrecque L, Rahimaly K, Imhoff S, Paquette M, Le Blanc O, Malenfant S, et al. Diminished  
540 dynamic cerebral autoregulatory capacity with forced oscillations in mean arterial pressure with  
541 elevated cardiorespiratory fitness. *Physiol Rep.* 2017;5(21). Epub 2017/11/11. doi:  
542 10.14814/phy2.13486. PubMed PMID: 29122957; PubMed Central PMCID: PMC5688778.
- 543 64. van Beek AH, Claassen JA, Rikkert MG, Jansen RW. Cerebral autoregulation: an overview of  
544 current concepts and methodology with special focus on the elderly. *J Cereb Blood Flow Metab.*  
545 2008;28(6):1071-85. Epub 2008/03/20. doi: 10.1038/jcbfm.2008.13. PubMed PMID: 18349877.
- 546 65. Hamner JW, Cohen MA, Mukai S, Lipsitz LA, Taylor JA. Spectral indices of human cerebral blood  
547 flow control: responses to augmented blood pressure oscillations. *J Physiol.* 2004;559(Pt 3):965-73.  
548 Epub 2004/07/16. doi: 10.1113/jphysiol.2004.066969. PubMed PMID: 15254153; PubMed Central  
549 PMCID: PMC1665190.
- 550 66. Ainslie PN, Barach A, Murrell C, Hamlin M, Hellemans J, Ogoh S. Alterations in cerebral  
551 autoregulation and cerebral blood flow velocity during acute hypoxia: rest and exercise. *Am J Physiol  
552 Heart Circ Physiol.* 2007;292(2):H976-83. Epub 2006/10/03. doi: 10.1152/ajpheart.00639.2006. PubMed  
553 PMID: 17012355.
- 554 67. Ainslie PN, Hamlin M, Hellemans J, Rasmussen P, Ogoh S. Cerebral hypoperfusion during hypoxic  
555 exercise following two different hypoxic exposures: independence from changes in dynamic  
556 autoregulation and reactivity. *Am J Physiol Regul Integr Comp Physiol.* 2008;295(5):R1613-22. Epub  
557 2008/09/05. doi: 10.1152/ajpregu.90420.2008. PubMed PMID: 18768767.

- 558 68. Smirl JD, Hoffman K, Tzeng YC, Hansen A, Ainslie PN. Relationship between blood pressure and  
559 cerebral blood flow during supine cycling: influence of aging. *J Appl Physiol* (1985). 2016;120(5):552-63.  
560 Epub 2015/11/21. doi: 10.1152/jappphysiol.00667.2015. PubMed PMID: 26586907; PubMed Central  
561 PMCID: PMC4773644.
- 562 69. Ogoh S, Dalsgaard MK, Yoshiga CC, Dawson EA, Keller DM, Raven PB, et al. Dynamic cerebral  
563 autoregulation during exhaustive exercise in humans. *Am J Physiol Heart Circ Physiol*.  
564 2005;288(3):H1461-7. Epub 2004/10/23. doi: 10.1152/ajpheart.00948.2004. PubMed PMID: 15498819.
- 565 70. Thomas BP, Yezhuvath US, Tseng BY, Liu P, Levine BD, Zhang R, et al. Life-long aerobic exercise  
566 preserved baseline cerebral blood flow but reduced vascular reactivity to CO<sub>2</sub>. *J Magn Reson Imaging*.  
567 2013;38(5):1177-83. Epub 2013/03/26. doi: 10.1002/jmri.24090. PubMed PMID: 23526811; PubMed  
568 Central PMCID: PMC3695025.
- 569 71. Battisti-Charbonney A, Fisher J, Duffin J. The cerebrovascular response to carbon dioxide in  
570 humans. *J Physiol*. 2011;589(Pt 12):3039-48. Epub 2011/04/28. doi: 10.1113/jphysiol.2011.206052.  
571 PubMed PMID: 21521758; PubMed Central PMCID: PMC3139085.
- 572 72. Claassen JA, Zhang R, Fu Q, Witkowski S, Levine BD. Transcranial Doppler estimation of cerebral  
573 blood flow and cerebrovascular conductance during modified rebreathing. *J Appl Physiol* (1985).  
574 2007;102(3):870-7. Epub 2006/11/18. doi: 10.1152/jappphysiol.00906.2006. PubMed PMID: 17110510.
- 575 73. Coverdale NS, Gati JS, Opalevych O, Perrotta A, Shoemaker JK. Cerebral blood flow velocity  
576 underestimates cerebral blood flow during modest hypercapnia and hypocapnia. *J Appl Physiol* (1985).  
577 2014;117(10):1090-6. Epub 2014/07/12. doi: 10.1152/jappphysiol.00285.2014. PubMed PMID:  
578 25012027.
- 579 74. Gorelick PB, Furie KL, Iadecola C, Smith EE, Waddy SP, Lloyd-Jones DM, et al. Defining Optimal  
580 Brain Health in Adults: A Presidential Advisory From the American Heart Association/American Stroke  
581 Association. *Stroke*. 2017;48(10):e284-e303. Epub 2017/09/09. doi: 10.1161/STR.000000000000148.  
582 PubMed PMID: 28883125; PubMed Central PMCID: PMC5654545.  
583

## 584 **Supporting Information**

- 585 S1 Fig. Prisma flow diagram
- 586 S1 Table. Prisma checklist

Articles identified in database searches of PubMed and CINAHL  
(n=87)

Articles screened by title/abstract after duplicates were removed  
(n=20)

Full text articles assessed for eligibility  
(n=9)

Articles included in review  
(n=7)

Articles excluded (n=11)

- HIE not primary protocol (n=8)
- Not measuring cerebral arteries (n=4)
- Animal study (n=1)

Article excluded due to non-experimental or quasi-experimental study design  
(n=2)
